# Supplementary material for: Microbiome of Unilateral Chronic Rhinosinusitis: A Controlled Paired Analysis
Source: MDPI journal article supplement (doi:10.3390/ijerph18189878), 2021-09-19
Supplement: s1 [file s1]

## Supplementary Materials

### SUPPLEMENTARY FIGURES

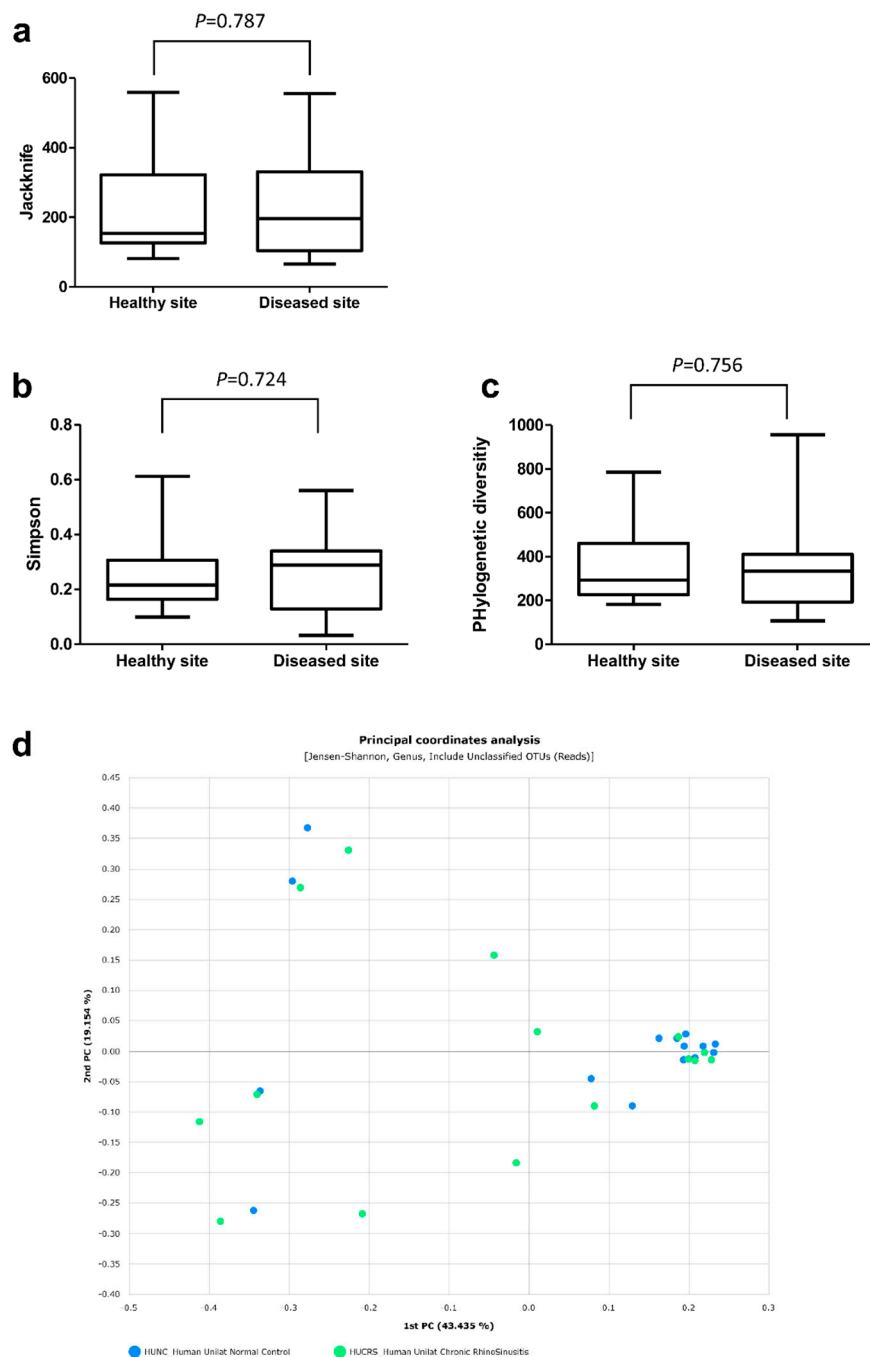

**Supplementary Figure S1.** Comparison of bacterial species richness and alpha diversity in samples of healthy site and diseased site. Richness represented by (a) Jackknife estimation. Alpha diversity examined by (b) Simpson index, and (c) phylogenetic diversity. Beta diversity examined by (d) principal coordinates analysis (PCoA) plots.

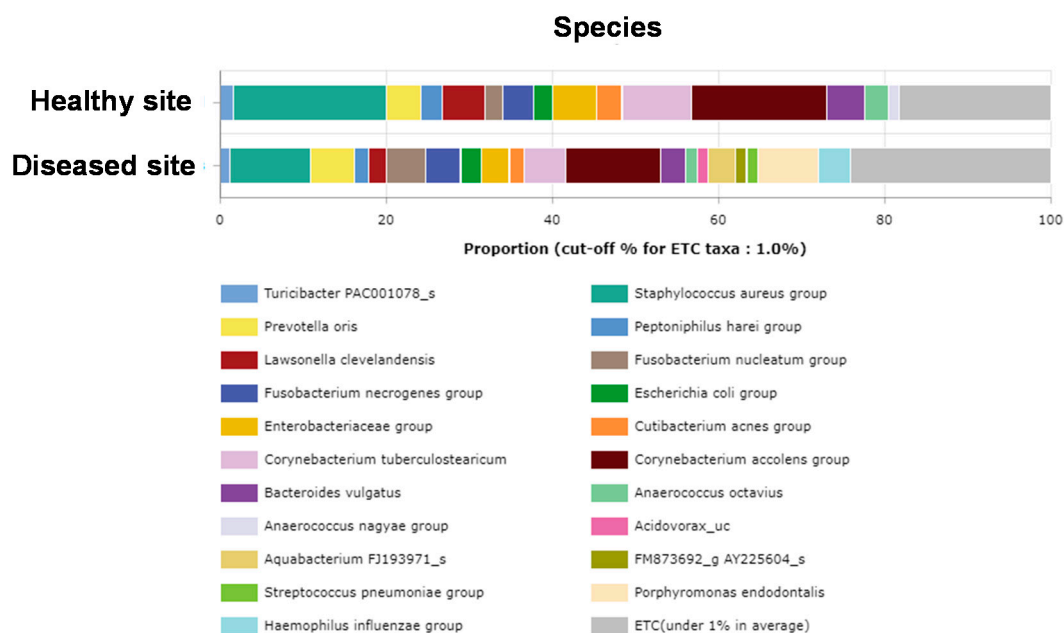

**Supplementary Figure S2.** Comparison of microbiota between healthy site (upper bar) and diseased site (lower bar) in species level. Stacked bars show average taxonomic composition of selected communities of bacterial species level.

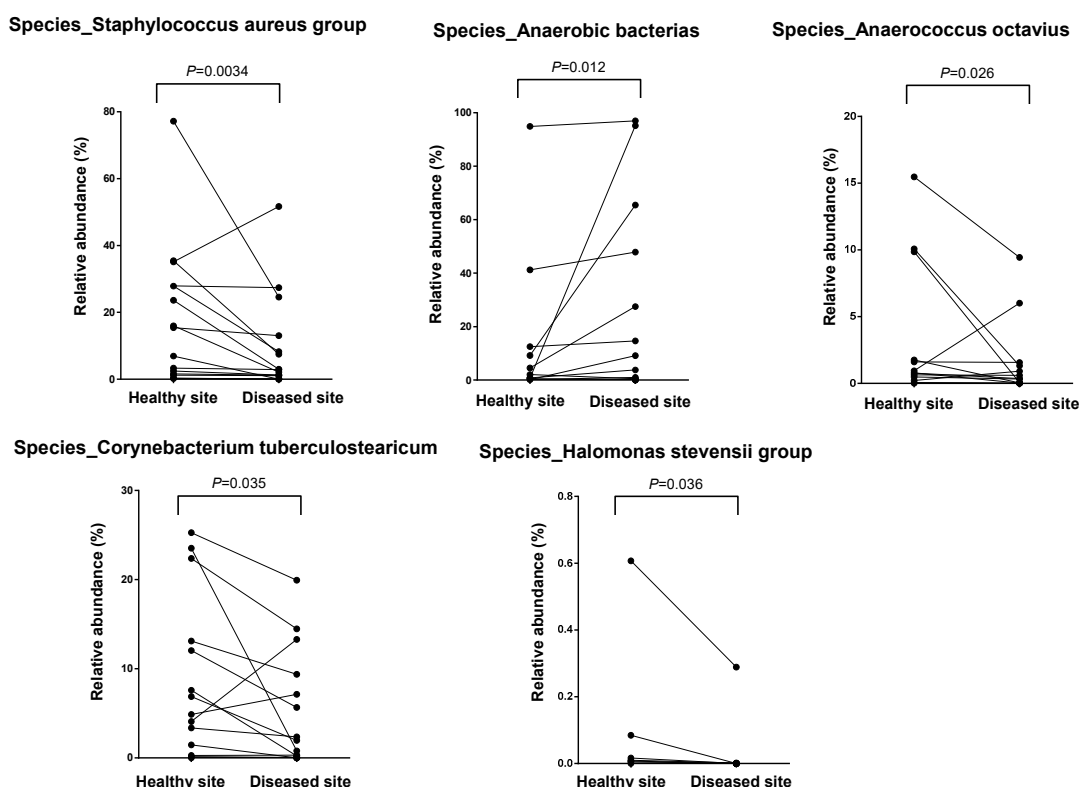

**Supplementary Figure S3.** Composition of representative microbiota at species level. Paired line plots show relative abundance of selected communities in comparison between healthy site and diseased site.

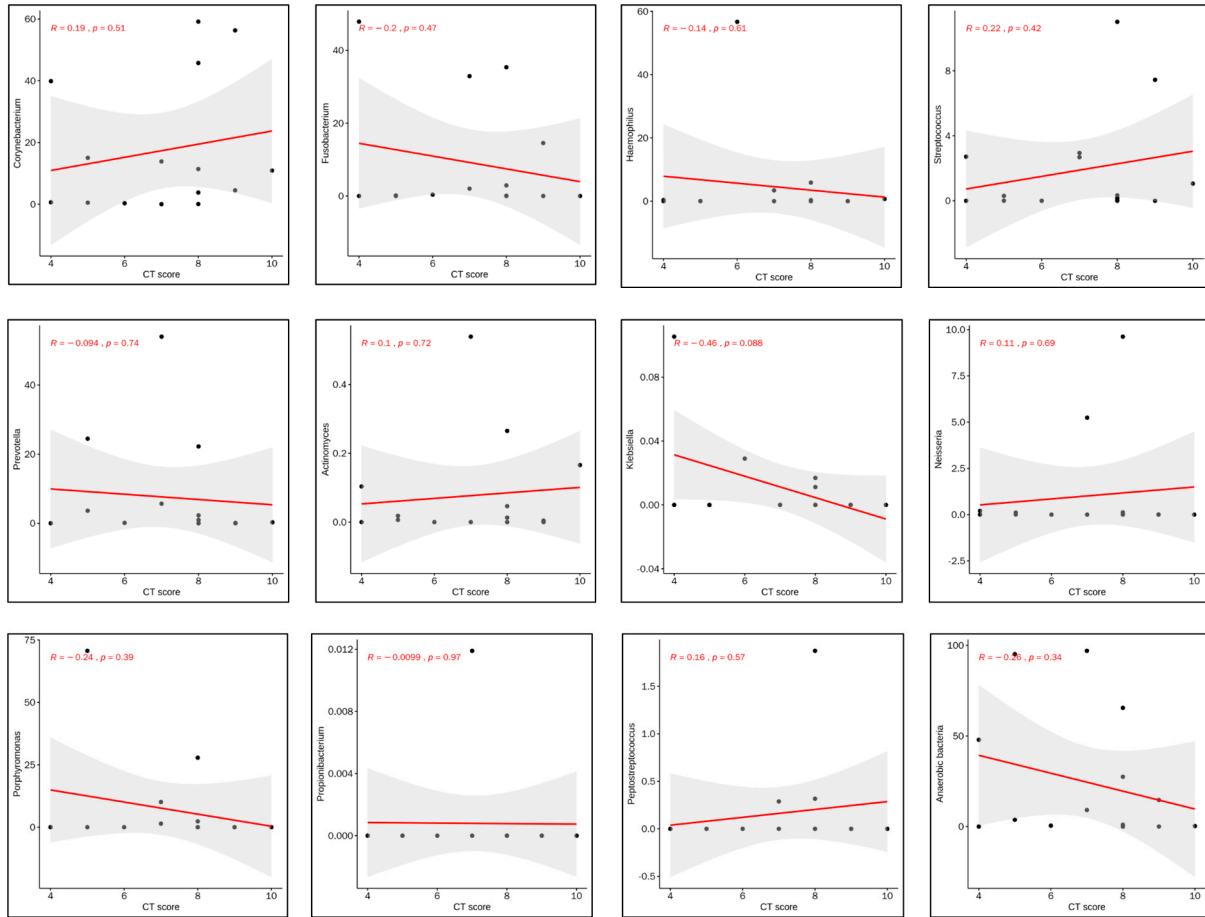

**Supplementary Figure S4.** Graphs of correlation between representative microbiota at genus level and Lund-Mackay CT score at diseased site.

$R$ , Pearson coefficient of correlation; CT score, Lund-Mackay CT score.

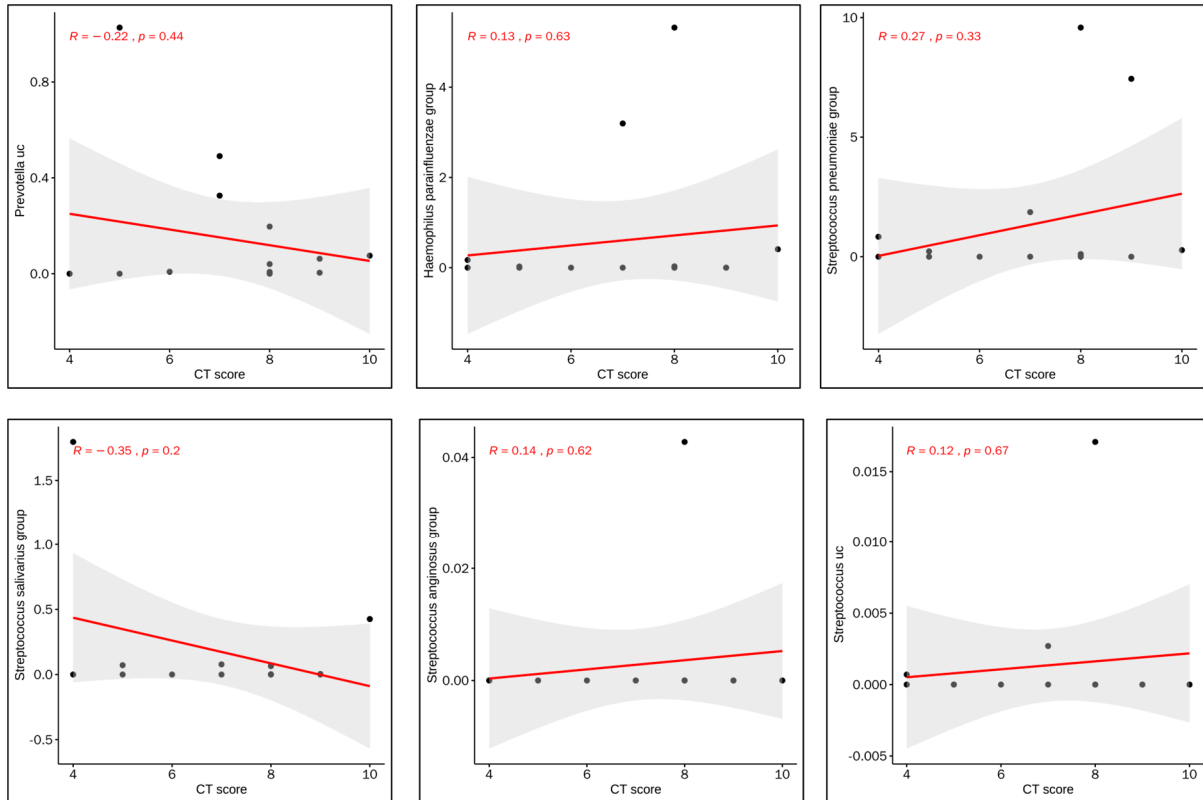

**Supplementary Figure S5.** Graphs of correlation between representative microbiota at species level and Lund-Mackay CT score at diseased site.

$R$ , Pearson coefficient of correlation; CT score, Lund-Mackay CT score.

1 **Supplementary Table S1. Results from sequence read counts**

| Subjects      | Total reads after pre-filter | Total valid reads | Reason of removed     |                       |                     | Length |         |     | Identified at the species level | %    | No of species |
|---------------|------------------------------|-------------------|-----------------------|-----------------------|---------------------|--------|---------|-----|---------------------------------|------|---------------|
|               |                              |                   | Low quality amplicons | Non-target ammplicons | Chimeric amplicaons | min    | average | max |                                 |      |               |
| Healthy site  |                              |                   |                       |                       |                     |        |         |     |                                 |      |               |
| 1             | 54717                        | 42920             | 11629                 | 5                     | 163                 | 399    | 414.7   | 445 | 42369                           | 98.7 | 66            |
| 2             | 209550                       | 201340            | 7579                  | 3                     | 628                 | 384    | 414.7   | 448 | 200381                          | 99.5 | 120           |
| 3             | 103114                       | 85157             | 17641                 | 6                     | 310                 | 148    | 425     | 454 | 84812                           | 99.6 | 83            |
| 4             | 136336                       | 104353            | 9354                  | 19517                 | 3112                | 346    | 417.1   | 449 | 103561                          | 99.2 | 81            |
| 5             | 38839                        | 28028             | 1173                  | 27                    | 9611                | 395    | 413.4   | 445 | 26709                           | 95.3 | 352           |
| 6             | 33591                        | 23856             | 1026                  | 2                     | 8707                | 398    | 415.6   | 445 | 22893                           | 96   | 258           |
| 7             | 65937                        | 56829             | 1602                  | 2                     | 7504                | 237    | 417.3   | 446 | 55089                           | 96.8 | 237           |
| 8             | 49593                        | 46109             | 1539                  | 1                     | 1944                | 397    | 413.9   | 449 | 45791                           | 99.3 | 74            |
| 9             | 53802                        | 51049             | 2122                  | 11                    | 620                 | 260    | 413.6   | 448 | 49997                           | 97.9 | 67            |
| 10            | 65060                        | 60991             | 3211                  | 32                    | 826                 | 304    | 413     | 449 | 60844                           | 99.8 | 123           |
| 11            | 68461                        | 65097             | 2185                  | 22                    | 1157                | 153    | 409.3   | 444 | 64822                           | 99.6 | 73            |
| 12            | 51147                        | 39300             | 11493                 | 2                     | 352                 | 400    | 417.2   | 455 | 39110                           | 99.5 | 111           |
| 13            | 220625                       | 209573            | 9855                  | 254                   | 943                 | 160    | 413.1   | 448 | 208560                          | 99.5 | 181           |
| 14            | 23153                        | 19067             | 3903                  | 80                    | 103                 | 237    | 414.4   | 448 | 18976                           | 99.5 | 226           |
| 15            | 50670                        | 10613             | 39894                 | 0                     | 163                 | 237    | 411.2   | 447 | 10420                           | 98.2 | 105           |
| Diseased site |                              |                   |                       |                       |                     |        |         |     |                                 |      |               |
| 1             | 104645                       | 92122             | 5608                  | 1356                  | 5559                | 256    | 412.2   | 448 | 86304                           | 93.7 | 443           |
| 2             | 245466                       | 236900            | 8088                  | 4                     | 474                 | 260    | 424.6   | 448 | 191401                          | 80.8 | 91            |
| 3             | 107821                       | 92540             | 14801                 | 2                     | 478                 | 148    | 421.3   | 449 | 91081                           | 98.4 | 213           |
| 4             | 159721                       | 136016            | 10726                 | 11778                 | 1201                | 394    | 413.6   | 454 | 134929                          | 99.2 | 82            |
| 5             | 32645                        | 24009             | 1090                  | 0                     | 7546                | 398    | 4140    | 440 | 23140                           | 96.4 | 256           |
| 6             | 29205                        | 24108             | 773                   | 0                     | 4324                | 394    | 421.6   | 445 | 23602                           | 97.9 | 177           |
| 7             | 69966                        | 61691             | 1633                  | 0                     | 6642                | 256    | 416.1   | 446 | 60148                           | 97.5 | 186           |
| 8             | 56200                        | 53322             | 1762                  | 31                    | 1085                | 384    | 414     | 449 | 52844                           | 99.1 | 153           |
| 9             | 50320                        | 47741             | 1639                  | 18                    | 922                 | 260    | 412     | 447 | 47294                           | 99.1 | 55            |
| 10            | 64128                        | 58460             | 5491                  | 49                    | 128                 | 260    | 417     | 449 | 58256                           | 99.7 | 90            |
| 11            | 54784                        | 51255             | 1927                  | 18                    | 1584                | 397    | 414     | 462 | 50863                           | 99.2 | 49            |
| 12            | 92199                        | 73349             | 16109                 | 1                     | 2740                | 260    | 416.6   | 456 | 73105                           | 99.7 | 29            |
| 13            | 304343                       | 289235            | 13679                 | 58                    | 1371                | 397    | 422.6   | 445 | 289190                          | 100  | 63            |
| 14            | 46283                        | 44677             | 1445                  | 0                     | 161                 | 399    | 412.4   | 444 | 44527                           | 99.7 | 140           |
| 15            | 30855                        | 11691             | 18969                 | 0                     | 195                 | 259    | 418.5   | 448 | 11606                           | 99.3 | 166           |
